# Supplementary material
Source: PubMed Central journal article supplement (PMC4206566)

**24 controls**  
**22 patients**

Change in  
family history

Excluded, did not meet inclusion criteria based on family medical history: **1 control**

**23 controls**  
**22 patients**

Scanning  
aberrations

- Could not complete scan: **3 controls, 4 patients**
- Visible motion artifact: **1 control**
- MRI abnormality: **1 patient**

**19 controls**  
**17 patients**

Unmatched  
controls

Unmatched to successfully scanned patients:  
**2 controls**

**17 controls**  
**17 patients**

Final sample

**REWARD**

**NEUTRAL**

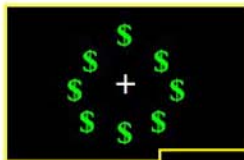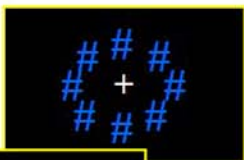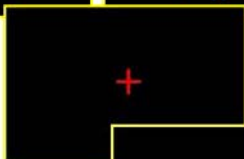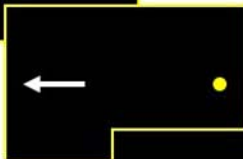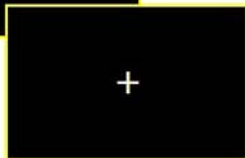

**Cue**

**Response Preparation**

**Antisaccade**

**Intertrial Interval (1.5, 3, or 4.5 sec)**

**4.5 sec**

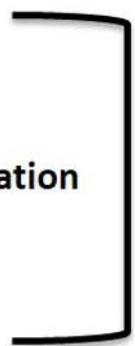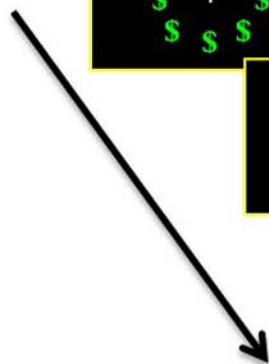

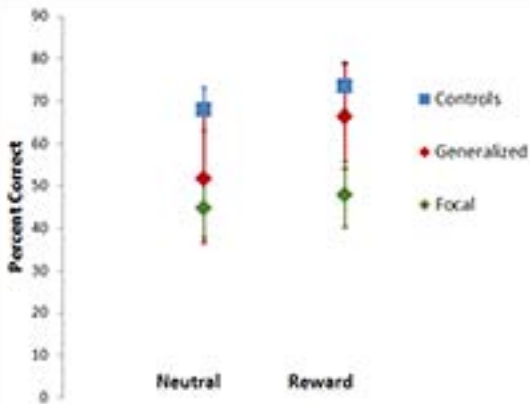

BOLD signal change (Left Cingulate)

0.075  
0.065  
0.055  
0.045  
0.035  
0.025  
0.015  
0.005  
-0.005  
-0.015

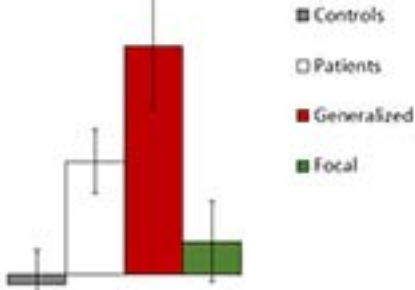

Supplement: NIHMS618727-supplement-Supp_FigureS1-S4.pdf [file NIHMS618727-supplement-Supp_FigureS1-S4.pdf]
